# Supplementary material
Source: Research Square preprint supplement (doi:10.21203/rs.3.rs-9314776/v1)

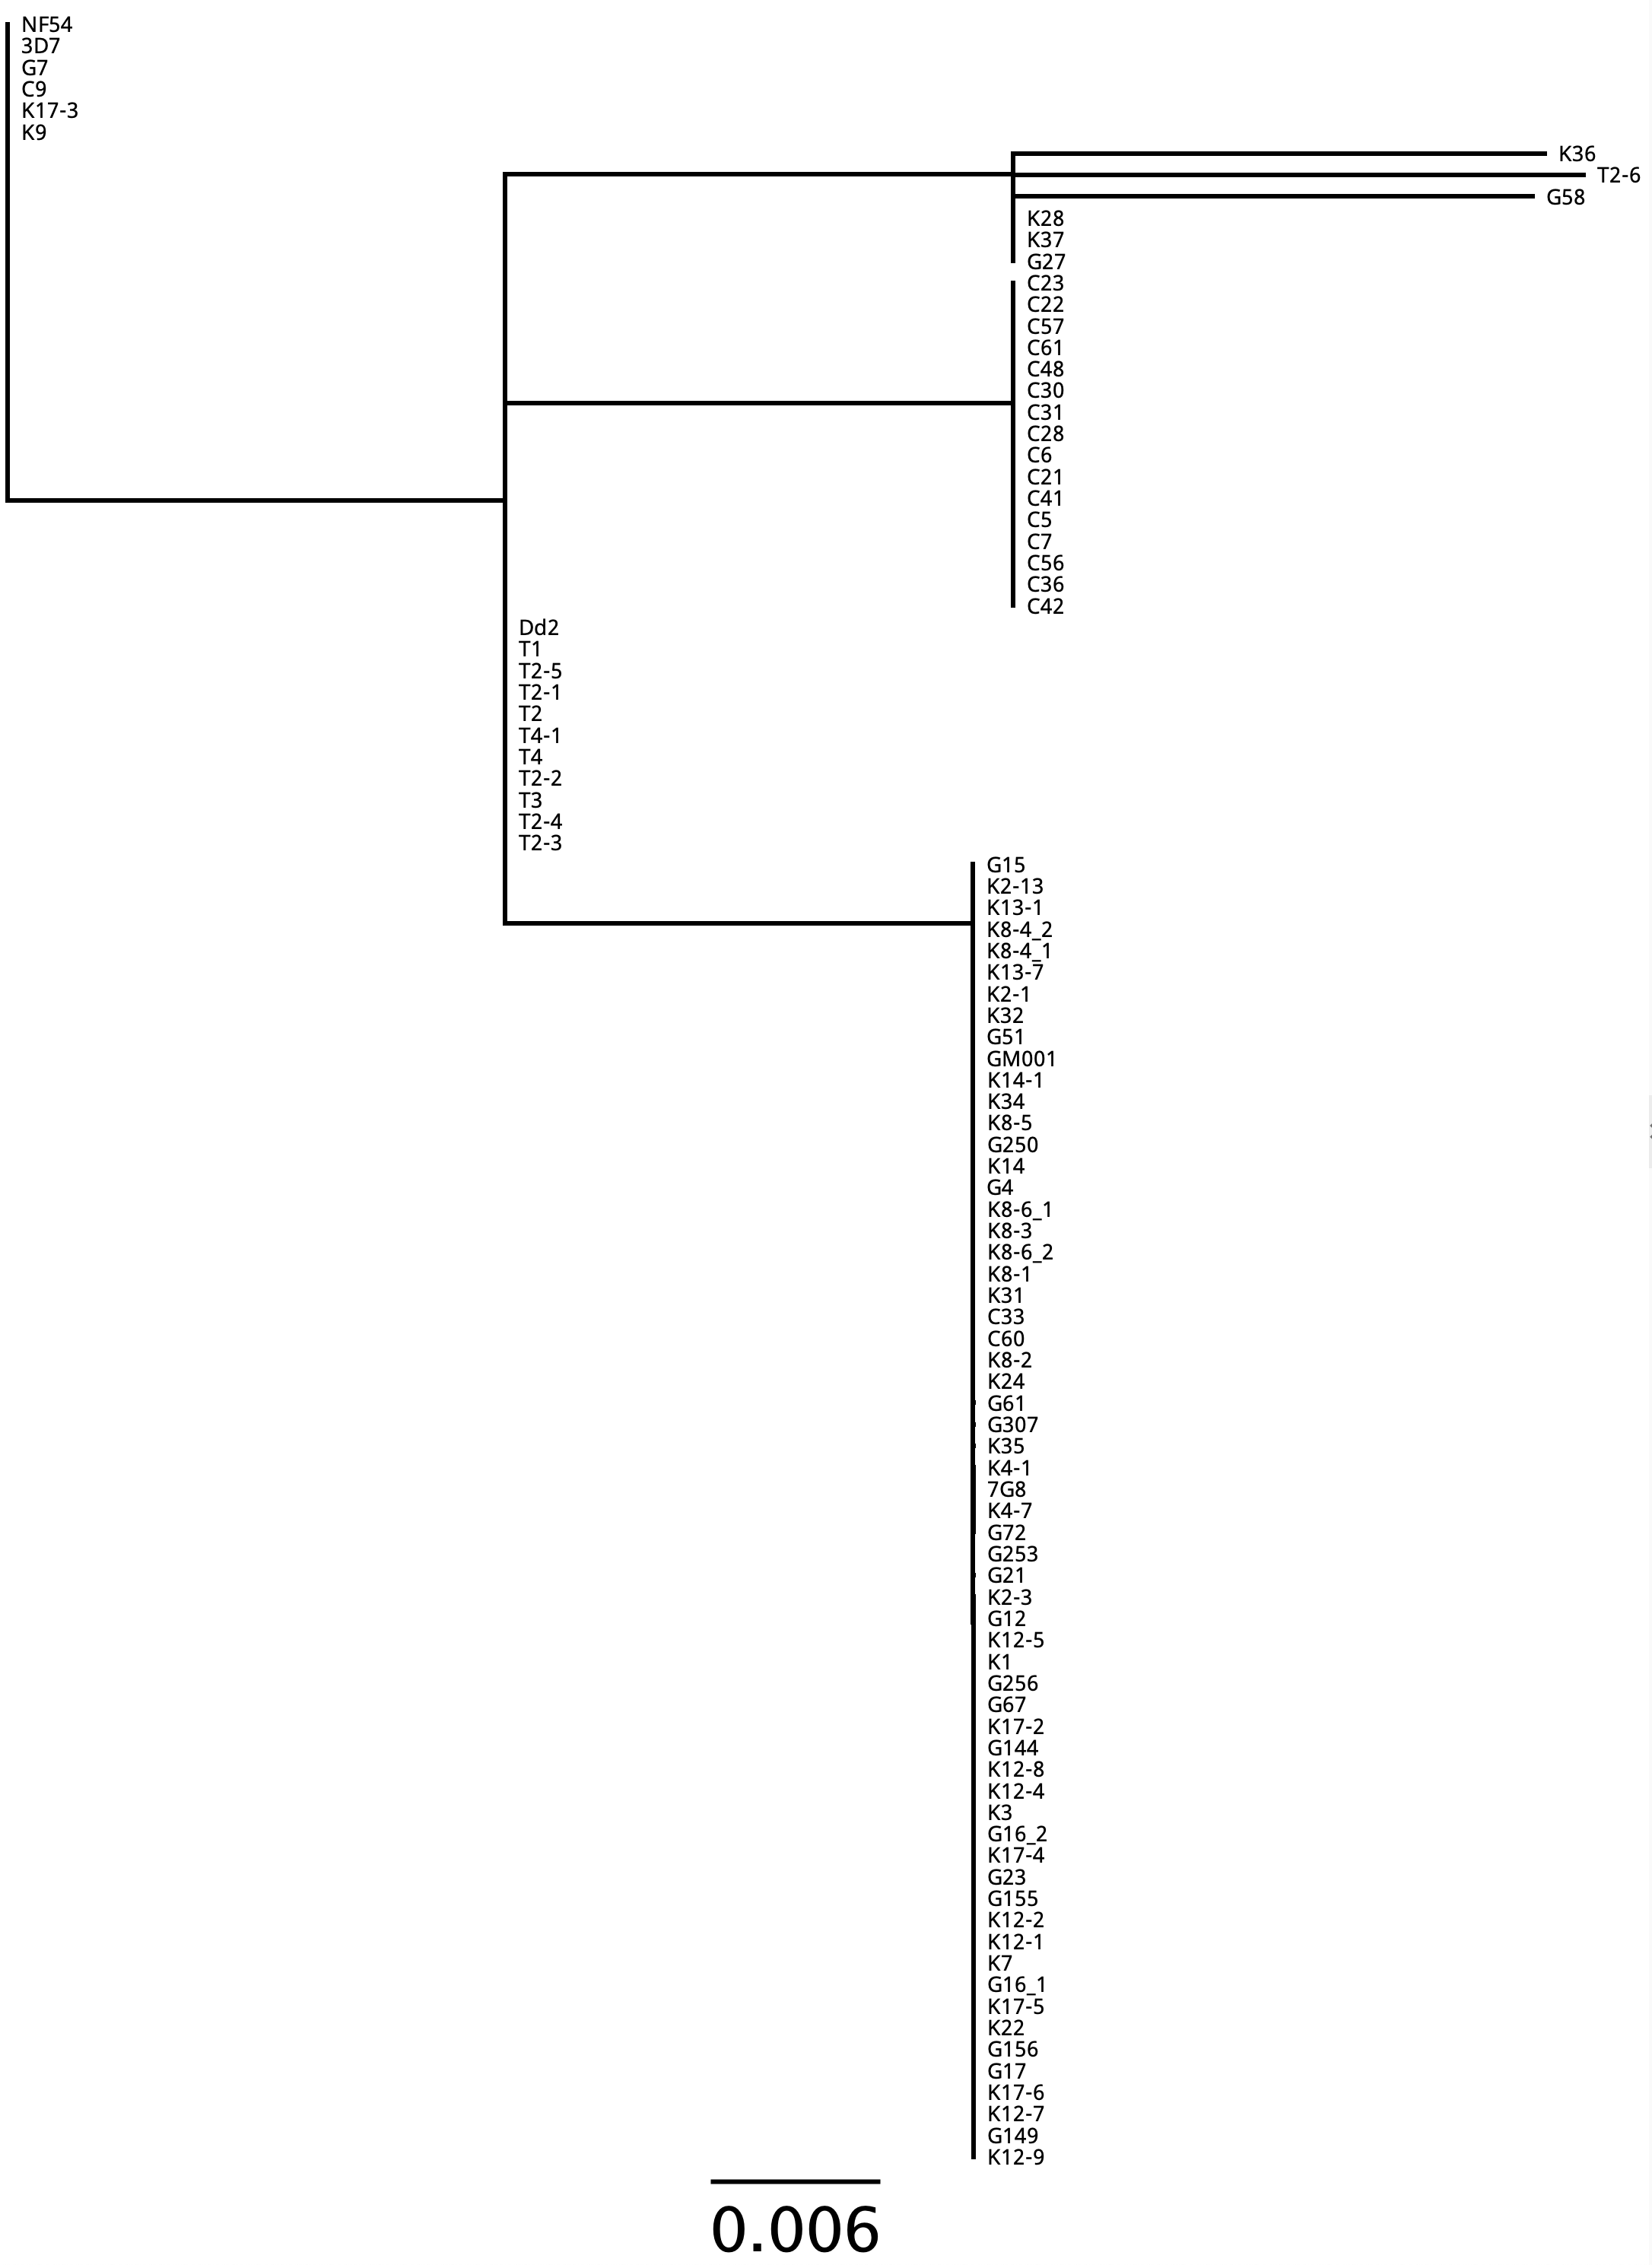


Haplotype 1 (n = 6)

Haplotype 2 (n=11)

Haplotype 3 (n=16)

Haplotype 4
(n=61)

Haplotype

6-8 (n=1 each)

Haplotype 5 (n=3)

**Haplotype Composition Descriptions**

1. 3D7 – Like
2. “DD2/T1-Like” All Thailand isolates
3. “C23-like” - All Columbian Isolates
4. “G15-like” - All Ghana and Kenyan Isolates
5. “K28-like” (minor) – mixed Kenyan and Ghanan
6. (minor) - G58
7. (minor) - Clone T2-6
8. (minor) – K36

**Supplemental Figure 1**. CHMI Isolate pfcsp CRR’s cluster by isolation origin. MAFFT aligned-RAxML tree of the Pf CSP central repeat region (CRR) of 100 representative sequences. Haplotypes are defined as clades which contain sequences ≥ 99.95% alignment identity revealing 4 major clusters with n ≥ 16 observations and 4 minor clusters with ≤ 3 observations.

**Supplemental Table 1.** Microsatellite Diversity Metrics by Population.


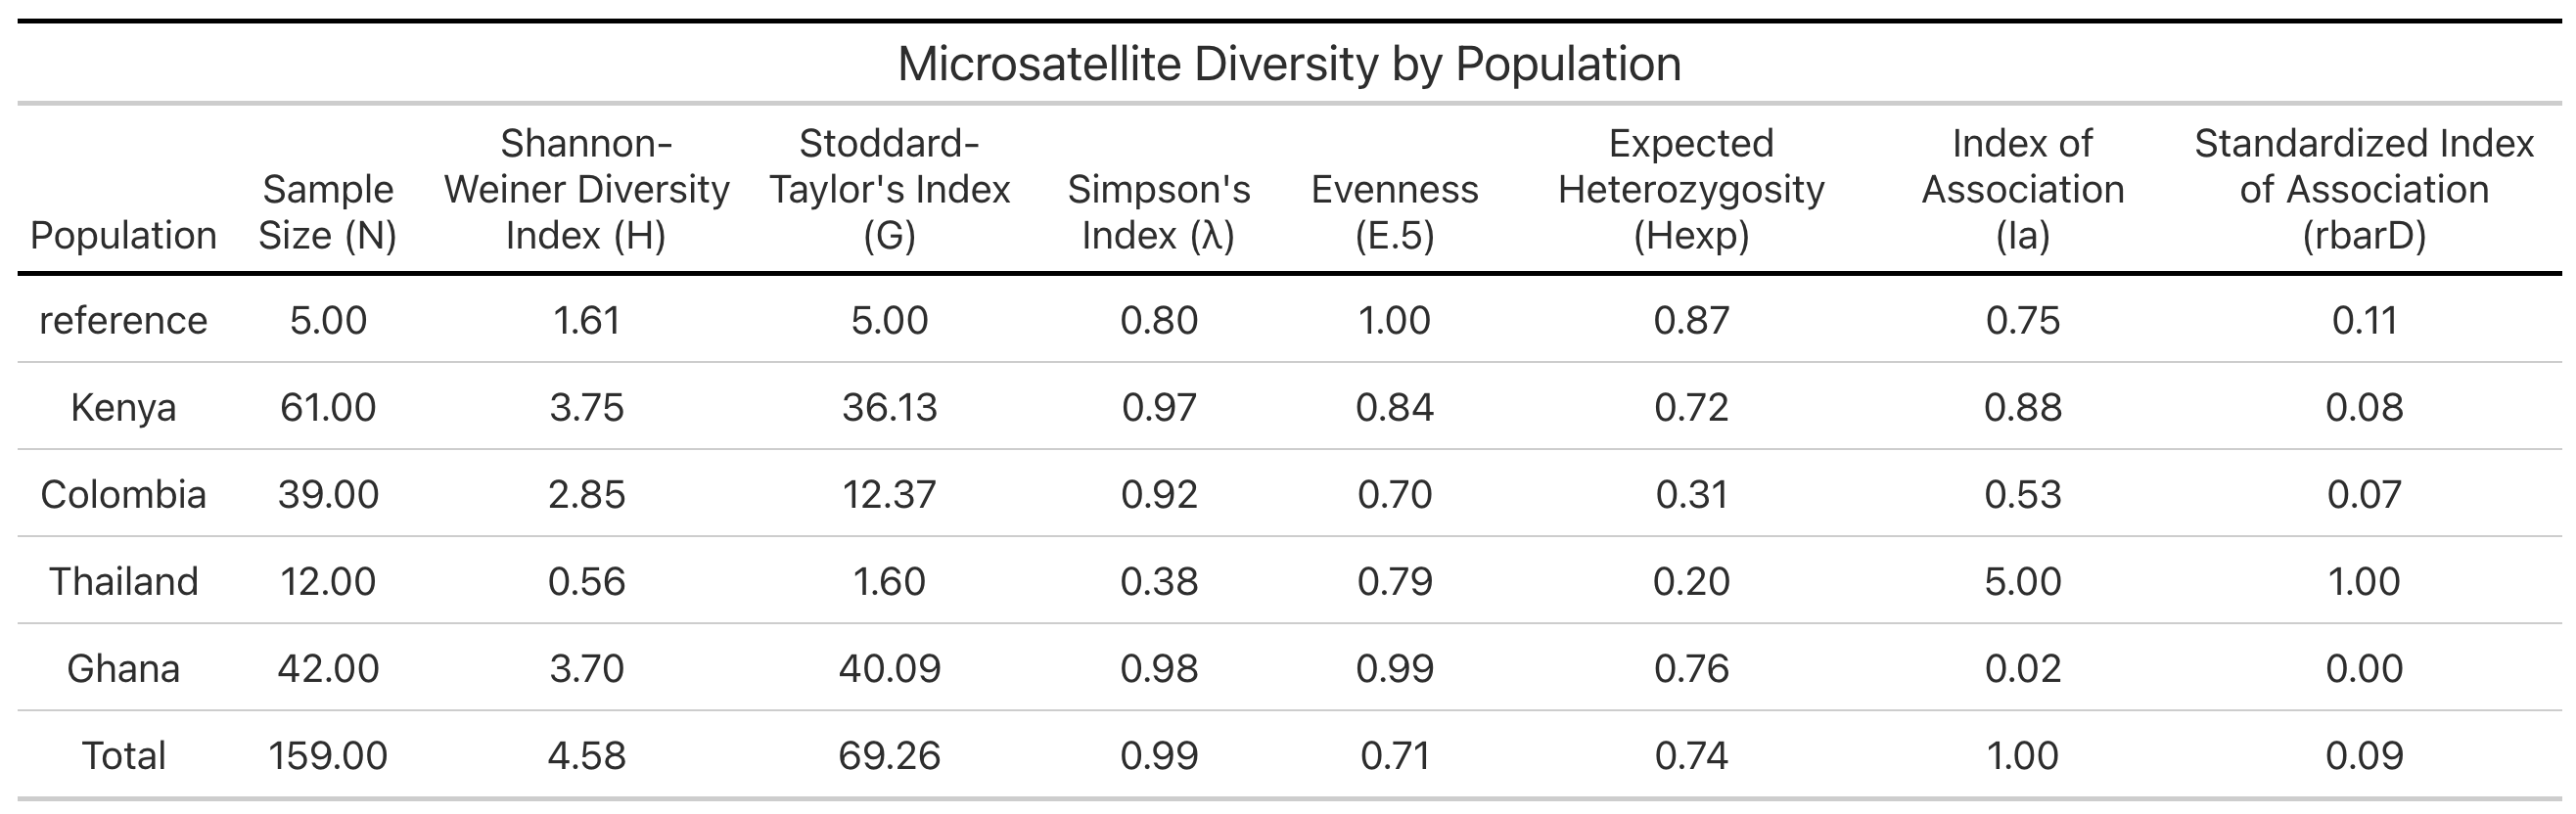


**Supplemental Table 2.** Microsatellite loci richness. Each number represents the total unique microsatellite alleles by locus and collection site.


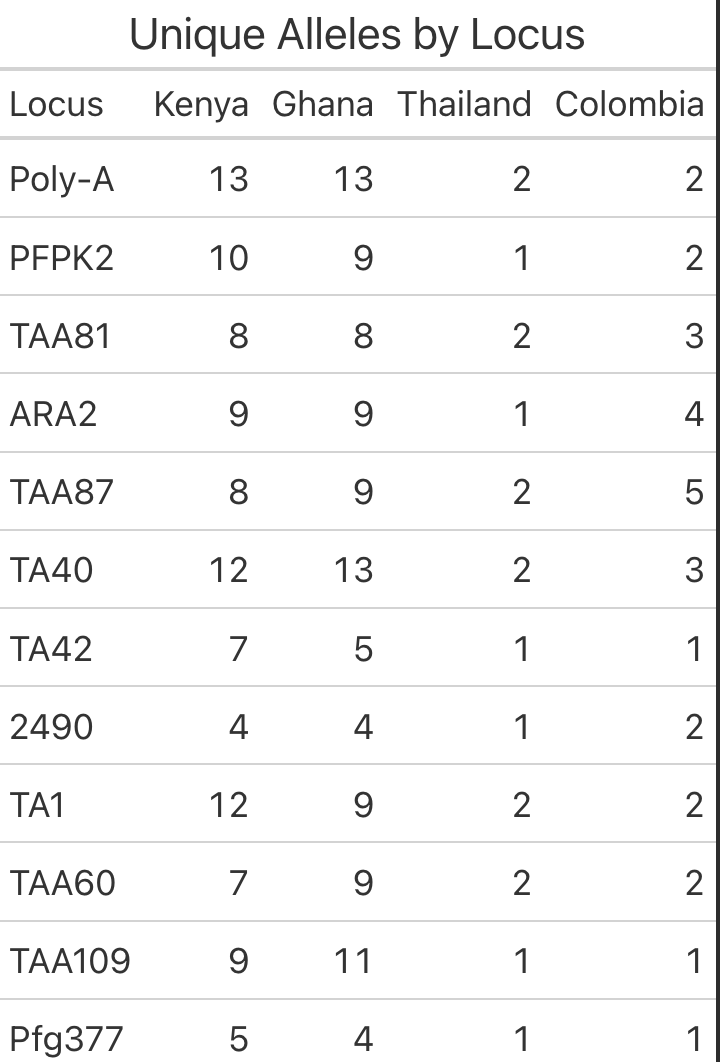


**Supplemental Table 3.** Controlled Human Malaria Infection (CHMI) clinical site information.


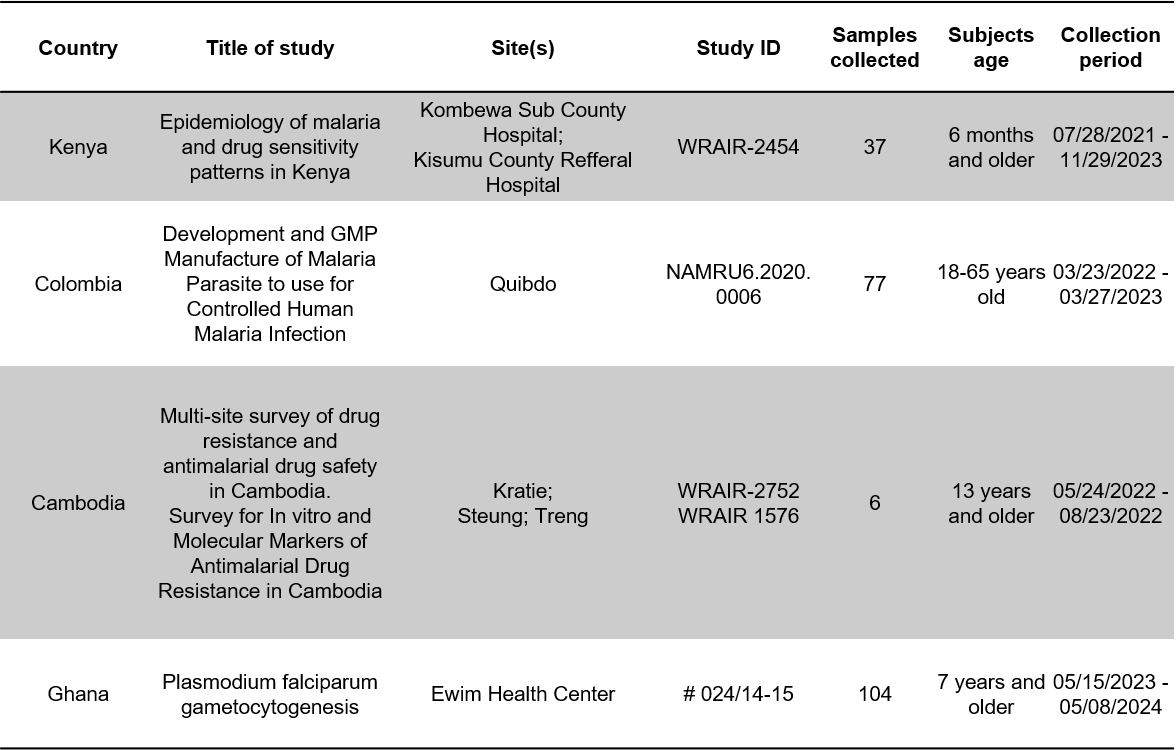

Supplement: Supplementary file 1 [file a6b33cca0c14661d85f83adf.docx]
